# Supplementary material
Source: Springer Nature journal article supplement (https://www.springermedizin.de/resource/supplementary/12911_2012_543_MOESM5_ESM.pdf/9525798)
Supplement: MOESM5 [file 9525798]

**Additional file 5: Patient questionnaire**

| Items                                                                                                                                                                                           | EHR implementation factor                       |
|-------------------------------------------------------------------------------------------------------------------------------------------------------------------------------------------------|-------------------------------------------------|
| 1) Patients' perception of the advantages and the usefulness of EHRs (for example, that EHRs will improve communication with their healthcare provider) is a facilitator to EHR implementation. | Perceived usefulness                            |
| 2) Patients' concern about EHR systems being less reliable than paper based information systems (for example, concerns about data loss) is a barrier to EHR implementation.                     | System reliability or dependability             |
| 3) Patients' perception that EHRs will improve the accuracy of their health record is a facilitator to EHR implementation.                                                                      | Accuracy                                        |
| 4) Patients' concern that EHR use may compromise the confidentiality of their health information is a barrier to EHR implementation.                                                            | Privacy and security concerns (confidentiality) |
| 5) Patients' concern that EHR use may compromise the security of their health information is a barrier to EHR implementation.                                                                   | Privacy and security concerns (security)        |
| 6) Patients' perception that the information contained in their EHR is easy to understand is a facilitator to EHR implementation.                                                               | Content appropriate to the user                 |
| 7) Patients' perception that EHRs contribute to improving the productivity and efficiency of clinical work is a facilitator to EHR implementation.                                              | Productivity                                    |
| 8) Patients' lack of familiarity with computers is a barrier to EHR implementation.                                                                                                             | Familiarity, ability with EHR                   |
| 9) Patients' perception that the advantages of EHRs outweigh the disadvantages of EHRs is a facilitator to EHR implementation.                                                                  | Risk-benefit equation                           |
| 10) Patients' perception that EHRs may aid in taking a more active role in managing their own health is a facilitator to EHR implementation.                                                    | Autonomy                                        |
| 11) Patients' motivation to use EHRs is a facilitator to EHR implementation.                                                                                                                    | Motivation to use EHR                           |
